# Supplementary material
Source: Springer Nature journal article supplement (https://www.springermedizin.de/resource/supplementary/13063_2013_1387_MOESM5_ESM.pdf/9619918)

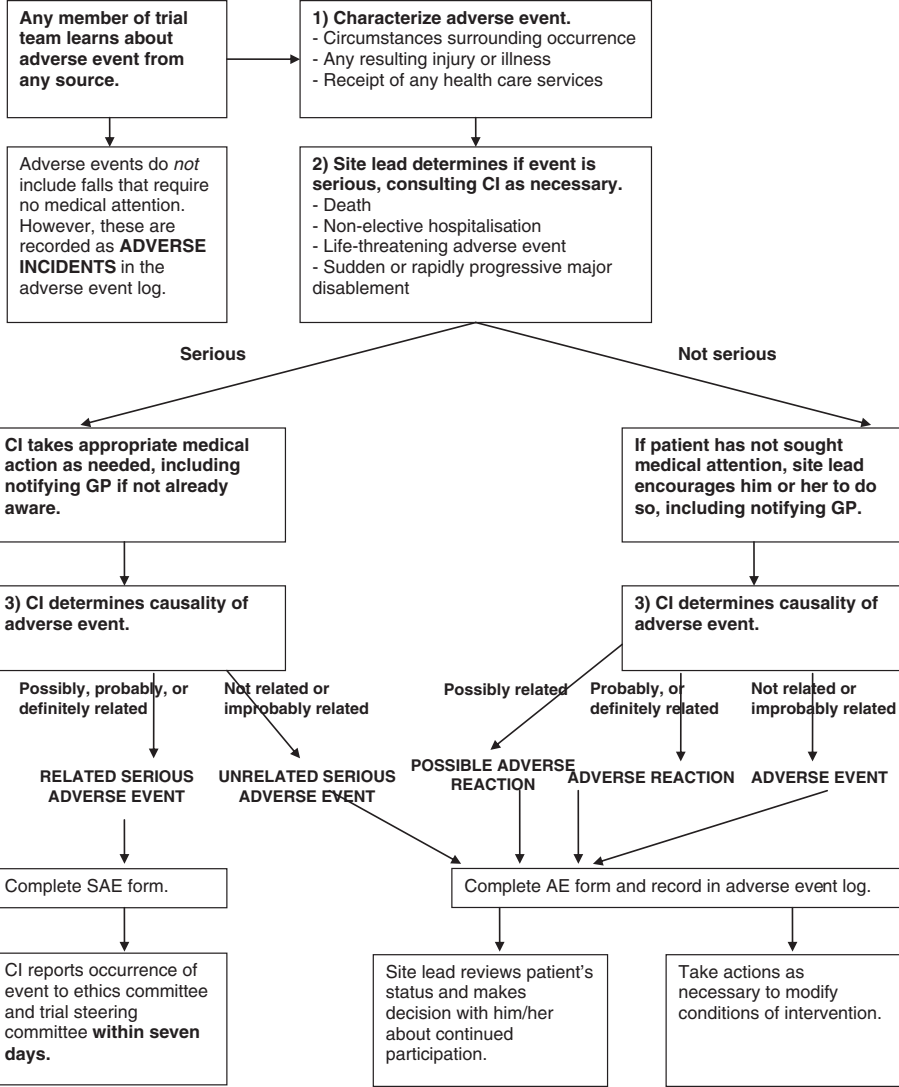

Supplement: MOESM5 [file 9619918]
